1 **The association between periodontitis and the impact of oral health on the**  
2 **quality of life of individuals with psoriasis and psoriatic arthritis**

3 Amanda Almeida Costa<sup>1</sup>, Luís Otávio Miranda Cota<sup>1</sup>, Rafael Paschoal Esteves  
4 Lima<sup>1</sup>, Alcione Maria Soares Dutra Oliveira<sup>2</sup>, Sheila Cavalca Cortelli<sup>3</sup>, José  
5 Roberto Cortelli<sup>3</sup>, Renata Magalhães Cyrino<sup>1</sup>, Victor Silva Mendes<sup>1</sup>, Tarcília  
6 Aparecida Silva<sup>1</sup>, Fernando Oliveira Costa<sup>1</sup>

7

8 **Number of Words: 3,853; tables:6; supplementary figure:1; references:47**

9 **Corresponding author:** Fernando Oliveira Costa

10 Full Professor in Periodontics, School of Dentistry, Department of Dental  
11 Clinics, Oral Pathology and Oral Surgery, Periodontology Division, Federal  
12 University of Minas Gerais, Antônio Carlos Avenue 6627, Pampulha. PO Box  
13 359 Zip Code 31270-901. Belo Horizonte, Minas Gerais – Brazil. Phone and  
14 Fax number: +55 31 3284 2466. email: focperio@uol.com.br

15

16 **Conflict of interest and funding**

17 The authors declare having no conflicts of interest.

18

---

<sup>1</sup> Department of Dental Clinics, Oral Pathology, and Oral Surgery, School of Dentistry, Universidade Federal de Minas Gerais, Brazil

<sup>2</sup> Pontifícia Universidade Católica de Minas Gerais, Belo Horizonte, Brazil.

<sup>3</sup> Department of Dentistry, Periodontics, Research Division, Universidade de Taubaté, São Paulo, Brazil

NOTE: This preprint reports new research that has not been certified by peer review and should not be used to guide clinical practice.

20 **ABSTRACT**

21 **Objective:** To evaluate the association between psoriasis (PSO), psoriatic  
22 arthritis (PsA) and periodontitis (PE), and the Oral Health-Related Quality of Life  
23 (OHRQoL) impacts on individuals with psoriatic disease's daily activities  
24 compared to the non-psoriatic ones.

25 **Materials & Methods:** 296 individuals with psoriatic disease (PSO n= 210, APS  
26 n= 86) (cases) and 359 without these diseases (controls) were included.  
27 Complete periodontal examinations and collection of variables of interest were  
28 performed. The Brazilian version of the *Oral Impacts on Daily Performance*  
29 (OIDP) instrument was applied.

30 **Results:** The prevalence of PE was higher in PsA (57.0%; OR=2.67 95%CI  
31 1.65–4.32;  $p<0.001$ ) than in PSO (34.3%; OR=1.05 95% CI 0.73–1.51;  
32  $p<0.001$ ) compared to controls (33.1%). Both PsA and PSO groups showed  
33 more sites and teeth with 4-6mm probing depth (PD) and had higher OIDP  
34 scores than controls ( $p<0.001$ ), thus indicating worse self-reported quality of  
35 life. PE, PSO+PE and consumption of alcohol/anxiolytics significantly influenced  
36 OHRQoL ( $p<0.05$ ). The influence of periodontal parameters on OHRQoL was  
37 observed for the presence of PE; PD >6 mm; clinical attachment level >6 mm;  
38 higher plaque index, % sites and teeth with bleeding on probing ( $p<0.05$ ).

39 **Conclusion:** Negative impacts of PE on the OHRQoL were demonstrated. The  
40 ones having PSO and especially PsA and PE presented significantly worse  
41 indicators.

42 **Keywords:** psoriasis, psoriatic arthritis, periodontitis, quality of life.

## 44 Introduction

45 The term periodontal diseases encompass changes that affect  
46 periodontal tissues which protect and insert the teeth, such as gingivitis and  
47 periodontitis (PE). PE is characterized by host-mediated, microbiologically  
48 associated inflammation, resulting in loss of periodontal attachment(1).  
49 Susceptibility to PE is related to polymicrobial disorders that result in dysbiosis  
50 considering its complex pathogenesis. The precise mechanisms that lead to the  
51 onset of PE are not completely known yet, although studies have shown that PE  
52 onset and progression depend on an imbalance in the individual's  
53 immunoinflammatory response to dental biofilm microorganisms. Since the  
54 presence of biofilm is essential but not sufficient for PE onset, the recognition of  
55 microbial components by defense cells and the production of inflammatory  
56 mediators is indeed crucial(2). This recognition can activate the acquired  
57 immune response, leading to the differentiation of T-helper cells (Th) into Th1,  
58 Th2, Th17 or T-regulatory cells (Treg)(3). Th1 and Th2 cells of the adaptive  
59 immune system are the main agents in the pathogenesis of immune-mediated  
60 diseases. Th17 cells and the cytokines IL-17 and IL-23 seem to play  
61 fundamental roles(3).

62 Since the American Academy of Periodontology (1999) workshop  
63 considerable evidence has emerged regarding potential effects of PE on  
64 systemic diseases such as endocrine, cardiac, autoimmune disorders and  
65 adverse pregnancy outcomes(4–6).

66 Psoriasis (PSO) is a chronic inflammatory skin disease characterized by  
67 the inflammation of the dermis and epidermis. Its prevalence varies due to

68 country-specific variations and the methodological variability of epidemiological  
69 studies, but in a global analysis, it has been outlined to vary from 0.14% to  
70 almost 3%. Given the growing and the aging of worldwide population and the  
71 fact that PSO primarily affects the adults, the burden associated with PSO may  
72 continue to increase(7). Psoriatic arthritis (PsA) is a chronic inflammatory  
73 musculoskeletal disease that has been defined as an inflammatory arthritis  
74 associated with PSO and seronegative for rheumatoid factor. PsA occurs in 2-  
75 3% of the general population, but among patients with PSO the prevalence  
76 varies from 6% to 42%, with involvement of the skin, nails, bones, tendons,  
77 ligaments, synovial membrane and joints(8,9).

78         Increasing evidence supports the association between PSO, PsA and  
79 multiple comorbidities including obesity, metabolic syndrome, cardiovascular  
80 disease, cerebrovascular disease, anxiety and depression (10,11) and PE  
81 (6,12–15).

82         The hypothesis of an association between these diseases is that PE can  
83 play a direct and indirect role in the development or exacerbation of psoriatic  
84 disease, as both consist of a complex interrelationship between cell types of the  
85 innate and acquired immune system, immunological factors produced by T  
86 cells, dendritic and Th1-mediated cells, through the IL-23/IL-17 axis and  
87 because they share some risk factors (e.g., diabetes and smoking) (16,17).

88         The relationship between PE, PSO and especially PsA has gaps and the  
89 pathophysiological paths of this association are not completely elucidated. To  
90 date, only 4 studies have been reported on the association of PE and PsA. (12–  
91 14,18) Hence, literature is significantly scarce in relation to studies that address  
92 the impact of OHRQoL of individuals with psoriatic disease.

93 This study is then justified by the need for greater knowledge about the  
94 potential association between PSO, PsA and PE, and the similarities in their  
95 comorbidities and risk factors, and also to seek a greater understanding of  
96 OHRQoL of the affected individuals. Thus, we hypothesized that higher OIPD  
97 scores are associated with the presence of worse periodontal clinical conditions  
98 in individuals with psoriatic disease.

99 The aim of this case-control study was to evaluate periodontal status, its  
100 clinical and epidemiological aspects and the impact of OHRQoL in PSO and  
101 PsA individuals compared to those without psoriatic disease.

102

## 103 **Materials and Methods**

### 104 Sampling

105 The sample size calculation was based on a variation of around 10%  
106 prevalence of PE among individuals with psoriatic disease, as reported by  
107 Mendes *et al.*(19) and Mishra *et al.*,(13) and a PE prevalence of 30-40% among  
108 controls and 50-60% among psoriatic individuals was assumed. The calculation  
109 was performed using the Fleiss method, with continuity correction using  
110 statistical software<sup>3</sup>. Based on a significance level of 0.05, 80% power and a  
111 case-control ratio of 1:2, 77 cases and 153 controls were determined to be the  
112 minimum required. However, during the data collection period (April 2020 –  
113 December 2022), 655 individuals were examined and considered eligible. The  
114 final sample consisted of 297 individuals in the case group, 210 individuals with  
115 PSO and 86 with PsA, and 359 without psoriasis (controls).

---

<sup>3</sup> Open Epidemiologic Statistics for Public Health, version 3.01, Boston, MA, USA.

116 PSO individuals were selected from those undergoing treatment and  
117 monitored at the Department of Dermatology at Hospital Eduardo de Menezes,  
118 and at the Center for Specialized Medicine, Teaching and Research in Belo  
119 Horizonte, Brazil, from March 20, 2020 until July 30, 2022. The control group  
120 consisted of individuals without any dermatological disease, selected from  
121 relatives, companions or employees of the respective reference centers.

122 The following inclusion criteria were established: individuals aged 35 to  
123 65 years, presence of  $\geq 14$  teeth(20) and absence of contraindications for clinical  
124 periodontal examination. Exclusion criteria included individuals undergoing  
125 antibiotic therapy or periodontal treatment over the last three months. During  
126 clinical periodontal examinations, third molars were included only when in the  
127 position of second molars (19).

128 This study was approved by the Research Ethics Committee from the  
129 Federal University of Minas Gerais – Brazil (#CAAE 20156019.0.0000.5149)  
130 and followed the 1975 Declaration of Helsinki as revised in 2013. All  
131 participants were informed about the study procedures and signed a consent  
132 form before participating in the study.

133

#### 134 Variables of interest

135 The following variables of interest were collected during the interviews:  
136 gender, age, family income, educational level, flossing (yes/no), toothbrushing  
137 frequency (times/day), body mass index (BMI), diabetes(21), use of anxiolytics  
138 and antidepressants, smoking(22) and alcohol consumption (yes,  
139 no/occasional).

## 140 Quality of Life assessment

141 A Brazilian version of the *Oral Impacts on Daily Performance* (OIDP)  
142 questionnaire was applied to assess OHRQoL (23,24). It assesses the  
143 frequency and severity of oral impact on individuals' daily performances, as  
144 such: (1) physical performance (eating and enjoying food, speaking and hearing  
145 clearly, teeth cleaning); (2) psychological performance (sleeping and relaxing,  
146 smiling showing teeth without embarrassment, maintaining balanced emotional  
147 state); (3) social performance (throughout their main job or social role, enjoying  
148 contact with people). The occurrence of any difficulty is recorded dichotomously  
149 (yes/no) and the frequency is indicated by the duration period with the following  
150 scores: (1) lesser than once a month, or an interval of up to 5 days total; (2)  
151 once or twice a month, or an interval of up to 15 days total; (3) once or twice a  
152 week, or an interval of up to 30 days total; (4) three or four times a week, or an  
153 interval of up to 3 months total and (5) every or almost every day, or an interval  
154 of more than 3 months total. Regarding severity, it varies between “no severity”  
155 (0) and “extremely severe” (5). The maximum score is 200 and it is equivalent  
156 to multiplying the frequency by the severity, with the final score given by the  
157 sum of the difficulties reported in the 8 categories (200= 8 categories x 5  
158 frequencies x 5 severity scores). The higher the score, the worse the OHRQoL  
159 is shown.

## 160 Clinical periodontal examination

161 The level of oral hygiene was assessed using the plaque index (PI) (25).  
162 Scores for each site were added and mean values were recorded per tooth and  
163 individual. Periodontal parameters were then evaluated in all teeth, and values

164 for each of the four sites (mesial, distal, buccal and lingual) were recorded:  
165 probing depth (PD), clinical attachment level (CAL), bleeding on probing (BOP).  
166 A manual periodontal probe model UNC-15, a clinical mirror and gauze were  
167 used.<sup>4</sup>

168

#### 169 Intra and inter-examiner agreement

170 Examinations, interviews and the OIDP questionnaire application were  
171 conducted by three experienced and trained periodontists (AAC, FOC and  
172 VSM). Intra- and inter-examiner agreements for periodontal examinations were  
173 performed in a pilot study with 12 individuals using the Kappa test and the  
174 intraclass correlation coefficient (ICC). The Kappa values for PD and CAL were  
175 >0.93 and the ICC >0.90.

#### 176 Definition and staging of periodontitis

177 Stages I, II, III and IV were included, according to the Tonetti *et al* (2018)  
178 criteria (1).

#### 179 Diagnosis of psoriasis and psoriatic arthritis

180 The diagnosis and severity of the disease (mild, moderate or  
181 advanced) were established by the group of dermatologists associated with the  
182 reference centers.

183 The psoriasis area and severity index (PASI)(26) was used and made  
184 available in all medical records. The PASI examines four regions of the body: (I)  
185 head and neck, (II) hands and arms, (III) chest, abdomen and back (trunk) and  
186 (IV) buttocks, thighs and legs. Each region is given a score to show how much

---

<sup>4</sup> UNC-15, Hu-Friedy, Chicago, IL, USA.



187 each is affected by PSO (area) and another for how bad the PSO is (severity).  
188 The area score can range from 0 (no psoriasis) to 6 (all skin affected). Each  
189 region's severity score is evaluated by adding redness, thickness, and scale  
190 scores, each of which is rated from 0 to 4, with a maximum of 12. The following  
191 cutoffs are used for severity: <7 mild, 7–12 moderate and >12 advanced  
192 psoriasis.

193 For the PsA diagnosis, The CASPAR criteria (27) was used: presence  
194 of confirmed inflammatory joint disease (joints, spine, or entheses); with at least  
195 three of these elements: current PSO, history of PSO or family history of PSO;  
196 dactylitis; bone formation in articular area (hands/feet); negative rheumatoid  
197 factor and psoriatic nail dystrophy. The sensitivity and specificity of the CASPAR  
198 criteria are 99.7% and 99.1%, respectively.

199

## 200 Statistical analysis

201 Initially, the groups were compared in relation to the following  
202 variables: gender, age, family income, educational level, use of dental floss,  
203 BMI, diabetes, continuous use of anxiolytics, antidepressants, smoking and  
204 alcohol consumption using Chi-square, Fischer and Mann-Whitney tests when  
205 appropriate. Regarding periodontal parameters (IP, BOP, PD, CAL) the values  
206 per individual were obtained by summing the measurements from all  
207 periodontal sites and expressed as means and/or percentages.

208 An indicator was created in relation to OHRQoL, calculating the  
209 product between frequency and severity, multiplied by 100 and divided by 200.  
210 In the descriptive analysis of qualitative variables, absolute and relative

211 frequencies were used, while for quantitative variables, measures of position,  
212 central tendency and dispersion were used. To compare categorical variables  
213 regarding QoL indicators, the Mann-Whitney and Kruskal -Wallis tests were  
214 used. The analysis of the frequency and severity of indicators of difficulty in  
215 carrying out daily activities using the OIDP are presented in Bootstrap intervals  
216 with a 95% confidence interval (CI). When the CI of an item does not overlap  
217 with one of another item within a group, there is statistical evidence that the  
218 items mean are statistically different. The software used in the analyzes was R.<sup>5</sup>  
219 Results with  $p < 0.05$  were considered significant.

220

## 221 **Results**

222 The sample consisted of 210 psoriasis individuals (PSO), 86 with PsA  
223 and 359 controls, 407 women and 248 men, with a mean age of 47.5 ( $\pm 5.1$ )  
224 years for the control group, 49.7 ( $\pm 4.2$ ) years for the PSO group ( $p < 0.001$ ); and  
225 48.8 ( $\pm 4.3$ ) for the PsA group ( $p = 0.011$ ) (Table 1). Regarding variables of  
226 interest, PSO individuals presented significantly higher values of the occurrence  
227 of diabetes ( $p = 0.004$ ), alcohol consumption ( $p = 0.001$ ), antidepressants  
228 ( $p = 0.006$ ) and anxiolytics ( $p = 0.008$ ), as well as higher BMI ( $p < 0.001$ ) (Table  
229 1) when compared to controls. PsA individuals also showed greater  
230 antidepressants ( $p < 0.001$ ) and anxiolytics use ( $p = 0.013$ ), diabetes ( $p = 0.002$ )  
231 and higher BMI ( $p < 0.001$ ) compared to controls. In addition, data demonstrated

---

<sup>5</sup> R software originally created by Ross Ihaka and Robert Gentleman, University of Auckland, New Zealand (version 3.6.1).

232 PsA individuals had greater alcohol (p=0.040) and antidepressants (p=0.036)  
233 consumption than PSO individuals.

234 Table 2 shows the comparison between groups regarding periodontal  
235 parameters. PsA individuals showed significantly more PE (57.0%; OR=2.67,  
236 95%CI: 1.65-4.32 p<0.001), while PSO (34.3%; OR=1.05; 0.73-1.51; p<0.001)  
237 than controls. PsA and PSO group revealed a greater number of sites and teeth  
238 with PD 4-6mm than controls (p<0.001). PD mean in PsA was significantly  
239 higher than in PSO (p=0.004) and controls (p=0.001), as well as in the  
240 comparison between PSO and controls (p<0.001). CAL frequency of >6mm was  
241 higher in PsA group, and significantly higher than in PSO group (p<0.001) and  
242 controls (p=0.001). Regarding BOP, higher mean values were observed in PsA,  
243 followed by PSO and controls (PsA>PSO>Controls; p<0.001) and  
244 (PSO>controls; p=0.034)]. As for IP; PsA group presented significantly higher  
245 and worse scores than those reported in the PSO group (p=0.001) and controls  
246 (p<0.001).

247 When analyzing OHRQoL, PsA group presented a significantly higher  
248 mean impact (p= 0.011) than controls (Supplementary Figure 1). Interestingly,  
249 when using the OIDP stratification into no impact (0), low (1-15), medium (16-  
250 45) and high (45-200) scores a significant difference was identified among PSO  
251 and PsA individuals, who have a higher mean of high OIDP scores when  
252 compared to controls (p<0.001). High OIDP scores indicate worse OHRQoL.

253 Table 3 shows the characterization of individuals regarding each OIDP  
254 activity, in frequency and severity. A significant difference exists when there is  
255 no overlap between CI as in the comparison of the frequency of discomfort  
256 when speaking between patients with and without PE in the control group: those

257 with PE experienced discomfort when speaking more frequently than those  
258 without PE. It is observed that in the control and PSO groups, 11 items do not  
259 overlap, indicating a significant difference between them, and that they are  
260 worse in the presence of PE. In the PsA group, the situation is reversed and 11  
261 items overlap. This result may suggest that PsA disease is more debilitating and  
262 has a greater impact on the individual's overall QoL, so that they feel and report  
263 less discomfort in the presence of PE or even worry less about their oral  
264 condition.

265 When evaluating the influence of variables of interest on QoL in a  
266 dichotomous manner (without/with impact), Table 4 shows that alcohol and  
267 anxiolytics use, presence of periodontitis, and psoriasis with periodontitis were  
268 significant ( $p < 0.001$ ). In the final logistic regression model, PE ( $p < 0.001$ ) and  
269 alcohol/anxiolytic use ( $p = 0.002$ ) remained significantly (Table 5).

270 Regarding periodontal parameters influence on QoL (Table 6), a  
271 significant difference was observed for the presence of PE; PD > 6mm; CAL  
272 >6mm ( $p < 0.001$ ); higher plaque index ( $p = 0.002$ ), higher BOP % of sites  
273 ( $p = 0.005$ ) and teeth ( $p = 0.006$ ). There was a higher PD < 3mm (41.6%)  
274 percentage of sites in individuals without impact and sites with PD > 6mm in  
275 individuals with impact (3.1%) ( $p < 0.001$ ). Also, higher PD > 6mm % of teeth  
276 (8.1% -  $p < 0.001$ ) in individuals with impact, with the same occurring for CAL >  
277 6mm [% of sites (8.4%) and teeth (14.5%) - ( $p < 0.001$ )]. These data  
278 demonstrated that a worse clinical periodontal condition had a negative impact  
279 on the analyzed individuals' OHRQo (Table 6).

280

## 281 Discussion

282 The present study demonstrated a risk association between PSO and  
283 PE, with PsA individuals having significantly worse OHRQoL indicators. A  
284 significantly higher PE prevalence was observed among PsA individuals (57%)  
285 when compared to controls (33.1%). In PSO (34.35%), the comparison was not  
286 significant despite the higher prevalence. PsA individuals had a 2.67 greater  
287 chance of developing PE than controls (OR =2.67;  $p<0.001$ ). Additionally, they  
288 presented a significantly worse periodontal clinical condition, expressed by  
289 higher means of PI, BOP, PD, CAL as well as % of sites with PD 3-6 mm and  
290 >6 mm.

291 A high prevalence of PE in psoriatic disease individuals is reported in  
292 several studies,(12–14,19,28–30) most of which addressed PSO. The literature  
293 does not always categorize PSO and PsA conditions separately. Most studies  
294 address PSO and some encompass PsA, (12–14,18) referring to these two  
295 categories of disease uniquely in their discussion, using terms such as  
296 “psoriatic disease” or even “psoriasis group”. This fact directly impacts the  
297 possibility of better understanding the prevalence of PE, specifically in PsA.  
298 However, within the available literature, when separately evaluating PSO and  
299 PsA, the high prevalence of PE in our study (57%) in PsA is very similar to the  
300 literature, as reported in the recent study by Mishra *et al* .(13) [(PsA (58.18%)  
301 vs. control (42.72 –  $p=0.042$ )]. Due to this gap in the literature, it is of high  
302 relevance that new studies should aim at individuals with PsA to better elucidate  
303 whether their possible greater immune vulnerability puts them at greater risk for  
304 PE, credited to the fact of greater severity of psoriatic disease.

305           Regarding the worse periodontal condition of PSO individuals, our  
306 findings corroborate other recent and robust studies reported (12,14,19,28). Our  
307 definition of “robust” was based on full-mouth examinations, significant samples  
308 and well-defined criteria for PE and psoriatic disease, bringing greater reliability  
309 to the findings.

310           A possible association between PE and increased risk of immune-  
311 mediated inflammatory diseases has been increasingly recognized. Although  
312 the biological mechanism that explains the increased risk of psoriatic disease  
313 among individuals with PE is unknown, several hypotheses have been  
314 proposed. One is related to its shared pathology, since exaggerated immune  
315 responses to the microbiota present on the epithelial surface are observed in  
316 both conditions, suggesting a genetic predisposition that affects dendritic cells  
317 and the expression of toll-like receptors (9,16,31,32). Therefore, these  
318 pathologies (PE, PsA and PSO) are immune-mediated and present similar  
319 etiopathogenic pathways, involving greater susceptibility of an individual with an  
320 immune response deficiency and common risk factors.

321           Observational studies have also confirmed findings of the association  
322 between PE and psoriatic disease (12,18,19). However, it is worth mentioning  
323 some limitations of these studies, such as: (i) use of retrospective data obtained  
324 from medical records(12,14); (ii) use of periodontal indexes to define  
325 PE(18,28,29); (iii) small samples(18,28,29); (iv) self-reported information on  
326 periodontal conditions and PSO(29,33) and (v) causality bias, as the diseases  
327 share numerous risk factors (e.g. smoking and diabetes) (6,15). To date, these  
328 limitations may together be an important factor in the presence of conflicting  
329 results and moderate evidence for an association between these diseases.

330 This study demonstrated that individuals with PSO and PsA showed  
331 significantly higher BMI values, anxiolytics/antidepressants use and occurrence  
332 of diabetes than controls. Those with PSO had greater alcohol consumption  
333 than controls ( $p=0.001$ ), and those with PsA had greater alcohol ( $p=0.040$ ) and  
334 antidepressants ( $p=0.036$ ) use than PSO individuals. These data corroborate  
335 previous findings, since these variables can contribute to systemic triggers  
336 activation leading to immunological changes (exacerbation in the expression of  
337 cytokines), endocrine and behavioral disorders (lack of hygiene, smoking and  
338 other harmful habits) which can predispose greater susceptibility to these  
339 diseases (4).

340 It is noteworthy that mood disorders (particularly depression) have  
341 been suggested to be significantly more prevalent in PSO individuals (up to  
342 62%) than in the general population (4 to 10%)(10). Other mental health  
343 comorbidities such as anxiety and suicidal ideation have been reported to be  
344 more prevalent in psoriatic disease individuals (34).

345 Contributing factors for this higher prevalence have been reported as:  
346 (1) the disease physical impact, with compromised dermal integrity and  
347 symptoms such as pain, itching, joint stiffness (35); (2) the clinical signs of the  
348 disease, such as skin disfigurement, negatively and directly impacting self-  
349 perception of one's own body (35) and (3) psychiatric disorders that may result  
350 in and contribute to the progression of psoriatic disease, suggesting that  
351 psoriatic disease and psychiatric conditions (e.g. depression) may have  
352 overlapping biological mechanisms – explained by an inflammatory model  
353 (10,34).

354 Several studies have reported that PSO strongly influences global QoL  
355 of psoriatic individuals(36–38) and a recent systematic review indicates a higher  
356 prevalence of depression and anxiety in PsA, demonstrating worse QoL of  
357 these individuals(39).

358 As evidence suggests that psoriatic patients have worse oral conditions  
359 and worse periodontal parameters, it can be assumed that the QoL of these  
360 individuals is even more negatively affected by oral changes. Literature already  
361 corroborates to the fact that oral conditions such as pain, cavities, tooth mobility  
362 and tooth loss, have negative effects on the well-being of individuals, especially  
363 in those with PE (38,40).

364 However, this is the first study that addresses OHRQoL in PsA  
365 individuals to date, particularly targeting periodontal condition. Only one recent  
366 study(41) evaluated OHRQoL in PSO. The authors reported a risk association  
367 between PSO and PE, with individuals with both diseases having significantly  
368 worse OHRQoL indicators. In addition, PE and PSO severity significantly  
369 increased these negative effects.

370 The hypothesis proposed in the study that individuals with PsA and PE  
371 would present worse OHRQoL indicators was confirmed. Results demonstrated  
372 that PsA group had significantly higher mean impact on OHRQoL ( $p= 0.011$ )  
373 than the controls. A significant difference was identified among PsA and PSO  
374 individuals, who had higher means of high OIDP scores when compared to  
375 controls ( $p<0.001$ ). High OIDP scores indicate worse QoL. These data reinforce  
376 the existing, albeit scarce, literature on the impact of psoriatic disease on  
377 OHRQoL (38,41).



378 A higher percentage of individuals with an impact on QoL was  
379 observed in those with PE (45.8%) when compared to those without PE (28.7%)  
380 when evaluating QoL and periodontal parameters. Thus, our findings  
381 corroborate those of negative impacts of PE on OHRQoL, reinforcing the  
382 literature that points out that worse periodontal conditions negatively and  
383 significantly affect individuals' routine activities. Literature reports studies using  
384 the OIDP to assess OHRQoL (40–43) while others used different instruments,  
385 such as the Oral Health Impact Profile questionnaire (OHIP-14) (44,45).

386 Some limitations must be attributed to the present study. The main one  
387 being inherent to a case-control study which does not demonstrate a causal link  
388 due to temporality; with our data, it is not possible to determine whether PE led  
389 to greater susceptibility to psoriatic disease or whether individuals with psoriatic  
390 disease develop more PE. Patient-reported outcomes (PROMs) such as the  
391 questionnaire application in an interview form may have potential interviewer  
392 bias, however the extensive impact grading [from 0 (null) to 5 (maximum)] tends  
393 to minimize this effect.

394 On the other hand, advantages can also be cited as (i) high number of  
395 individuals in the sample, increasing the statistical power of the study, since  
396 PSO has a low prevalence, making it difficult to obtain large samples; (ii) PSO  
397 and PsA diagnosis by specialized physicians; (iii) full mouth periodontal  
398 examination with robust criteria for PE definition, as it is recognized that the  
399 quality of periodontal data and the criteria for defining PE strongly impacts the  
400 results of association studies(46); and (iv) uniform methodology for clinical  
401 assessment and questionnaire application. However, we highlight the need for

402 additional studies in different populations, with different study designs to expand  
403 our knowledge on OHRQoL in psoriatic disease patients.

404 Thus, our study can be considered an important starting point for  
405 investigations into OHRQoL PsA patients and the association between PE and  
406 psoriatic disease, highlighting the inclusion of PE as another important  
407 comorbidity associated mainly with PsA. Also, the need for attention to the oral  
408 condition and its impacts of OHRQoL by both dentists and doctors of these  
409 individuals who already present greater physical-emotional vulnerability is  
410 advised.

411 Periodontists and dermatologists must broaden their clinical vision,  
412 examining the oral cavity and dermatological lesions, providing a holistic view of  
413 the individual. Multidisciplinary interaction is desirable to improve the impact of  
414 these diseases on the QoL of individuals with psoriatic disease and PE.

415

## 416 **Conclusion**

417 This study demonstrated the negative impacts of PE on the OHRQoL  
418 of the analyzed individuals, being PSO, mainly PsA and PE individuals  
419 presenting significantly worse OHRQoL indicators.

420

## 421 **Acknowledgments**

422

423                    This study was supported by the National Council for Scientific and  
424   Technological Development - CNPq, Brazil (Productivity research grants n°  
425   307034/2015-1; n° 307024/2015-6 and funding n° 402158/2016-4).

## References

1. Tonetti MS, Greenwell H, Kornman KS. Staging and grading of periodontitis: Framework and proposal of a new classification and case definition. *J Clin Periodontol*. 2018;45:S149–61. DOI: [10.1111/jcpe.12945](https://doi.org/10.1111/jcpe.12945)
2. Cekici A, Kantarci A, Hasturk H, Van Dyke TE. Inflammatory and immune pathways in the pathogenesis of periodontal disease. *Periodontol 2000* . 2014;64(1):57–80. DOI: [10.1111/prd.12002](https://doi.org/10.1111/prd.12002)
3. Bunte K, Beikler T. Th17 Cells and the IL-23/IL-17 Axis in the Pathogenesis of Periodontitis and Immune-Mediated Inflammatory Diseases. *Int J Mol Sci* . 2019;20(14).  
<https://doi.org/10.3390/IJMS20143394>
4. Linden GJ, Lyons A, Scannapieco FA. Periodontal systemic associations: review of the evidence. *J Clin Periodontol* . 2013;40:S8–19.  
[doi.1111/jcpe.12064](https://doi.org/10.1111/jcpe.12064)
5. Sanz M, Marco del Castillo A, Jepsen S, Gonzalez-Juanatey JR, D’Aiuto F, Bouchard P, et al. Periodontitis and cardiovascular diseases: Consensus report. *J Clin Periodontol* . 2020;1,47(3):268–88.  
DOI: [10.1111/jcpe.13189](https://doi.org/10.1111/jcpe.13189)
6. Ungprasert P, Wijarnpreecha K, Wetter D. Periodontitis and risk of psoriasis : a systematic review and. *J Eur Acad Dermatology Venereol*. 2017;31:857–62. DOI: [10.1111/jdv.14051](https://doi.org/10.1111/jdv.14051)
7. Parisi R, Iskandar IYK, Kontopantelis E, Augustin M, Griffiths CEM, Ashcroft DM. National, regional, and worldwide epidemiology of psoriasis: systematic analysis and modelling study. *BMJ* . 2020; 28 ,369.  
<https://doi.org/10.1136/BMJ.M1590>
8. Scotti L, Franchi M, Marchesoni A, Corrao G. Prevalence and incidence of psoriatic arthritis: A systematic review and meta-analysis. *Semin Arthritis Rheum* . 2018; 48(1):28–34. DOI: [10.1016/j.semarthrit.2018.01.003](https://doi.org/10.1016/j.semarthrit.2018.01.003)
9. Shah K, Paris M, Mellars L, Changolkar A, Mease PJ. Real-world burden

- of comorbidities in US patients with psoriatic arthritis. *RMD open* . 2017;3(2):e000588. DOI: [10.1136/rmdopen-2017-000588](https://doi.org/10.1136/rmdopen-2017-000588)
10. Dowlatshahi EA, Wakkee M, Arends LR, Nijsten T. The prevalence and odds of depressive symptoms and clinical depression in psoriasis patients: A systematic review and meta-analysis. *J Invest Dermatol* . 2014;134(6):1542–51. DOI: [10.1038/jid.2013.508](https://doi.org/10.1038/jid.2013.508)
  11. Fleming P, Bai JW, Pratt M, Sibbald C, Lynde C, Gulliver WP. The prevalence of anxiety in patients with psoriasis : a systematic review of observational studies and clinical trials. *J Eur Acad Dermatol Venereol*. 2017;798–807. DOI: [10.1111/jdv.13891](https://doi.org/10.1111/jdv.13891)
  12. Egeberg A, Mallbris L, Gislason G, Hansen PR, Mrowietz U. Risk of periodontitis in patients with psoriasis and psoriatic arthritis. *J Eur Acad Dermatology Venereol* . 2017; 31(2):288–93. DOI: [10.1111/jdv.13814](https://doi.org/10.1111/jdv.13814)
  13. Mishra S, Johnson L, Agrawal S, Rajput S. Assessment of Periodontal status in Patients with Psoriatic Arthritis: A retrospective, case-control study. *J Clin Exp Dent* . 2021;13(8):776–83 DOI: [10.4317/jced.58125](https://doi.org/10.4317/jced.58125)
  14. Su N-Y, Huang J-Y, Hu C-J, Yu H-C, Chang Y-C. Increased risk of periodontitis in patients with psoriatic disease: a nationwide population-based retrospective cohort study. *PeerJ* . 2017;5:e4064. DOI: [10.7717/peerj.4064](https://doi.org/10.7717/peerj.4064)
  15. Zhang X, Gu H, Xie S, Su Y. Periodontitis in patients with psoriasis: A systematic review and meta-analysis. *Oral Dis*. 2022 Jan 1;28(1):33–43. DOI: [10.1111/odi.13617](https://doi.org/10.1111/odi.13617)
  16. Dalmády S, Kemény L, Antal M, Gyulai R. Periodontitis: a newly identified comorbidity in psoriasis and psoriatic arthritis . Vol. 16, *Expert Review of Clinical Immunology*. Taylor and Francis Ltd; 2020; p. 101–8. DOI: [10.1080/1744666X.2019.1700113](https://doi.org/10.1080/1744666X.2019.1700113)
  17. Mease PJ. Inhibition of interleukin-17, interleukin-23 and the TH17 cell pathway in the treatment of psoriatic arthritis and psoriasis. *Curr Opin Rheumatol* . 2015 ;27(2):127–33. DOI: [10.1097/BOR.000000000000147](https://doi.org/10.1097/BOR.000000000000147)

18. Polineni S, Gopinath H, Ramani JR, Yadav S, Aravindakshan R, Yerragudi N, et al. The association of psoriasis and psoriatic arthritis with periodontitis: A hospital-based case-control study. *Indian J Dermatol Venereol Leprol* . 2023;0:1–5. DOI: [10.25259/IJDVL.331.2022](https://doi.org/10.25259/IJDVL.331.2022)
19. Mendes VS, Cota LOM, Costa AA, Oliveira AMSD, Costa FO. Periodontitis as another comorbidity associated with psoriasis: A case-control study. *J Periodontol* . 2019;1–9. Doi.10.1002/JPER.18-0394
20. Papantonopoulos GH. Effect of periodontal therapy in smokers and non-smokers with advanced periodontal disease: results after maintenance therapy for a minimum of 5 years. *J Periodontol* . 2004;75(6):839–43. DOI: [10.1902/jop.2004.75.6.839](https://doi.org/10.1902/jop.2004.75.6.839)
21. ADA. Classification and diagnosis of diabetes: Standards of medical care in Diabetesd2018. *Diabetes Care*. 2018;41:S13–27. DOI: [10.2337/dc18-S002](https://doi.org/10.2337/dc18-S002)
22. Tomar SL, Asma S. Smoking-Attributable Periodontitis in the United States: Findings From NHANES III. *J Periodontol*. 2000;71(5):743–51. DOI: [10.1902/jop.2000.71.5.743](https://doi.org/10.1902/jop.2000.71.5.743)
23. Adulyanon S, Vourapukjaru J, Sheiham A. Oral impacts affecting daily performance in a low dental disease Thai population. *Community Dent Oral Epidemiol*. 1996;24(6):385–9. DOI: [10.1111/j.1600-0528.1996.tb00884.x](https://doi.org/10.1111/j.1600-0528.1996.tb00884.x)
24. Abegg C, Fontanive VN, Tsakos G, Davoglio RS, de Oliveira MMC. Adapting and testing the oral impacts on daily performances among adults and elderly in Brazil. *Gerodontology* . 2015;32(1):46–52. DOI: [10.1111/ger.12051](https://doi.org/10.1111/ger.12051)
25. Silness J, Løe H. Periodontal disease in pregnancy II. Correlation between oral hygiene and periodontal condition. *Acta Odontol Scand*. 1964;22(1):121–35. DOI: [10.3109/00016356408993968](https://doi.org/10.3109/00016356408993968)
26. Fredriksson T, Pettersson U. Severe psoriasis--oral therapy with a new retinoid. *Dermatologica* . 1978; 157(4):238–44. DOI: [10.1159/000250839](https://doi.org/10.1159/000250839)

27. Taylor W, Gladman D, Helliwell P, Marchesoni A, Mease P, Mielants H. Classification criteria for psoriatic arthritis: development of new criteria from a large international study. *Arthritis Rheum* . 2006; 54(8):2665–73. DOI: [10.1002/art.21972](https://doi.org/10.1002/art.21972)
28. Fadel HT, Flytström I, Calander A-M, Bergbrant I-M, Heijl L, Birkhed D. Profiles of Dental Caries and Periodontal Disease in Individuals With or Without Psoriasis. *J Periodontol*. 2013;84(4):477–85. DOI: [10.1902/jop.2012.120119](https://doi.org/10.1902/jop.2012.120119)
29. Lazaridou E, Tsikrikoni A, Fotiadou C, Kyrmanidou E, Vakirlis E, Giannopoulou C, et al. Association of chronic plaque psoriasis and severe periodontitis: A hospital based case-control study. *J Eur Acad Dermatology Venereol*. 2013;27(8):967–72. DOI: [10.1111/j.1468-3083.2012.04615.x](https://doi.org/10.1111/j.1468-3083.2012.04615.x)
30. Moura MF, Cota LOM, Silva TA, Cortelli SC, Ferreira GA, López MM, et al. Clinical and microbiological effects of non-surgical periodontal treatment in individuals with rheumatoid arthritis: a controlled clinical trial. *Odontology* . 2021; 109(2):484–93. DOI: [10.1007/s10266-020-00566-0](https://doi.org/10.1007/s10266-020-00566-0)
31. Sabat R, Philipp S, Höflich C, Kreutzer S, Wallace E, Asadullah K, et al. Immunopathogenesis of psoriasis. *Exp Dermatol*. 2007;16(10):779–98. Doi.10.1111/j.1600-0625.2007.00629.x
32. Sharma A, Raman A, Pradeep A. Association of chronic periodontitis and psoriasis: periodontal status with severity of psoriasis. *Oral Dis* . 2015;21(3):314–9. DOI:10.1111/odi.12271
33. Nakib S, Han J, Li T, Joshipura K, Qureshi AA. Periodontal disease and risk of psoriasis among nurses in the United States. *Acta Odontol Scand*. 2013;71(6):1423–9. DOI: [10.3109/00016357.2013.766360](https://doi.org/10.3109/00016357.2013.766360)
34. Koo J, Marangell LB, Nakamura M, Armstrong A, Jeon C, Bhutani T, et al. Depression and suicidality in psoriasis: review of the literature including the cytokine theory of depression. *J Eur Acad Dermatol Venereol* . 2017;31(12):1999–2009. DOI: [10.1111/jdv.14460](https://doi.org/10.1111/jdv.14460)

35. Verhoeven EWM, Kraaimaat FW, van de Kerkhof PCM, van Weel C, Duller P, van der Valk PGM, et al. Prevalence of physical symptoms of itch, pain and fatigue in patients with skin diseases in general practice. *Br J Dermatol* . 2007;156(6):1346–9. DOI:10.1111/j.1365-2133.2007.07916.x
36. Langley RGB, Krueger GG, Griffiths CEM. Psoriasis: epidemiology, clinical features, and quality of life. *Ann Rheum Dis*. 2005;18–23. DOI: [10.1136/ard.2004.033217](https://doi.org/10.1136/ard.2004.033217)
37. Palijan T Žarkovi, Kovaevi D, Vlastelica M, Dadi-Hero E, Sarilar M. Quality of life of persons suffering from schizophrenia, psoriasis and physical disabilities. *Psychiatr Danub*. 2017;29(1):60–5. DOI: [10.24869/psyd.2017.60](https://doi.org/10.24869/psyd.2017.60)
38. Salman A, Yucelten AD, Sarac E, Saricam MH, Perdahlifis N. Impact of psoriasis in the quality of life of children, adolescents and their families : a cross-sectional study. *Ann Bras Dermatology*. 2018;93(6):819–23. doi: [10.1590/abd1806-4841.20186981](https://doi.org/10.1590/abd1806-4841.20186981)
39. Kamalaraj N, El-Haddad C, Hay P, Pile K. Systematic review of depression and anxiety in psoriatic arthritis. *Int J Rheum Dis* . 2019; 22(6):967–73. doi: 10.1111/1756-185X.13553.
40. Cunha-Cruz J, Hujoel PP, Kressin NR. Oral health-related quality of life of periodontal patients. *J Periodontal Res* . 2007;42(2):169–76. DOI:10.1111/j.1600-0765.2006.00930.x
41. Costa AA, Cota LOM, Mendes VS, Oliveira AMSD, Cyrino RM, Costa FO. Periodontitis and the impact of oral health on the quality of life of psoriatic individuals: a case-control study. *Clin Oral Investig* . 2021;25(5):2827–36. doi: 10.1007/s00784-020-03600-1
42. Needleman I, McGrath C, Floyd P, Biddle A. Impact of oral health on the life quality of periodontal patients. *J Clin Periodontol* . 2004; 31(6):454–7. DOI:10.1111/j.1600-051X.2004.00498.x
43. Wandera MN, Engebretsen IM, Rwenyonyi CM, Tumwine J, Åstrøm AN.



- Periodontal status, tooth loss and self-reported periodontal problems effects on oral impacts on daily performances, OIDP, in pregnant women in Uganda: A cross-sectional study. *Health Qual Life Outcomes*. 2009 Oct 14;7:89. doi: 10.1186/1477-7525-7-89.
44. Borges T de F, Regalo SC, Taba M, Siéssere S, Mestriner W, Semprini M. Changes in Masticatory Performance and Quality of Life in Individuals With Chronic Periodontitis. *J Periodontol* . 2013;84(3):325–31. doi: 10.1902/jop.2012.120069
45. Llanos AH, Benítez Silva CG, Ichimura KT, Rebeis ES, Giudicissi M, Romano MM, et al. Impact of aggressive periodontitis and chronic periodontitis on oral health-related quality of life. *Braz Oral Res* . 2018;32:e006. doi: 10.1590/1807-3107bor-2018.vol32.0006.
46. Costa FO, Guimarães AN, Cota LOM, Pataro AL, Segundo TK, Cortelli SC, et al. Impact of different periodontitis case definitions on periodontal research. *J Oral Sci*. 2009;51(2):199–206. doi: 10.2334/josnusd.51.19.

## Tables and Figures

Table 1. Comparative analysis of variables of interest in the studied groups.

Table 2. Periodontal parameters of the studied groups.

Table 3. Comparison between groups in relation to frequency and severity for each OIDP item,

Table 4. Dichotomous influence of variables of interest on quality of life.

Table 5. Logistic regression of variables of interest associated with impacts on quality of life.

Table 6. Association analysis between quality of life and periodontal parameters.

## Supporting Figure 1. Stratification of OIDP scores between groups

**Table 1. Comparative analysis of variables of interest in the studied groups.**

| Variables                           | Group                    |                               |                                        | A-B                |                   | A-C                |                   | B-C            |                   |
|-------------------------------------|--------------------------|-------------------------------|----------------------------------------|--------------------|-------------------|--------------------|-------------------|----------------|-------------------|
|                                     | Control (A)<br>(n = 359) | Psoriasis<br>(B)<br>(n = 210) | Psoriatic<br>arthritis (C)<br>(n = 86) | p                  | OR<br>CI (95%)    | p                  | OR<br>CI (95%)    | p              | OR<br>CI (95%)    |
| <b>Gender</b>                       |                          |                               |                                        |                    |                   |                    |                   |                |                   |
| Feminine                            | 225 (62.7%)              | 128 (61.0%)                   | 48 (55.81%)                            | 0.683*             | 1                 | 0.984*             | 1                 | 0.768*         | 1                 |
| Masculine                           | 134 (37.3%)              | 82 (39.0%)                    | 38 (44.19%)                            |                    | 1.08 (0.76; 1.53) |                    | 1.00 (0.61; 1.62) |                | 0.93 (0.55; 1.55) |
| <b>Age (years)</b>                  |                          |                               |                                        |                    |                   |                    |                   |                |                   |
| Mean ± s.d.                         | 47.5 ± 5.1               | 49.7 ± 4.2                    | 48.8 ± 4.3                             | <b>&lt;0.001</b> ‡ | -                 | <b>0.011</b> ‡     | -                 | 0.840‡         | -                 |
| <b>Income</b>                       |                          |                               |                                        |                    |                   |                    |                   |                |                   |
| 1-2 Brazilian Minimum<br>Wage (BMW) | 146 (40.7%)              | 84 (40.0%)                    | 33 (38.4%)                             | 0.439*             | 1                 | 0.926*             | 1                 | 0.636*         | 1                 |
| 3-4 BMW                             | 129 (35.9%)              | 85 (40.5%)                    | 32 (37.2%)                             |                    | 1.15 (0.78; 1.68) |                    | 1.10 (0.64; 1.88) |                | 0.96 (0.54; 1.7)  |
| 5 BMW or more                       | 84 (23.4%)               | 41 (19.5%)                    | 21 (24.4%)                             |                    | 0.85 (0.54; 1.34) |                    | 1.11 (0.6; 2.03)  |                | 1.3 (0.67; 2.53)  |
| <b>Educational level</b>            |                          |                               |                                        |                    |                   |                    |                   |                |                   |
| < 8 years                           | 248 (69.1%)              | 144 (68.6%)                   | 55 (64.0%)                             | 0.899*             | 1                 | 0.360*             | 1                 | 0.442*         | 1                 |
| > 8 years                           | 111 (30.9%)              | 66 (31.4%)                    | 31 (36.0%)                             |                    | 1.02 (0.71; 1.48) |                    | 1.26 (0.77; 2.06) |                | 1.23 (0.73; 2.08) |
| <b>Smoking</b>                      |                          |                               |                                        |                    |                   |                    |                   |                |                   |
| No                                  | 314 (87.5%)              | 183 (87.1%)                   | 69 (80.2%)                             | 0.911*             | 1                 | 0.082*             | 1                 | 0.129*         | 1                 |
| Yes                                 | 45 (12.5%)               | 27 (12.9%)                    | 17 (19.8%)                             |                    | 1.03 (0.62; 1.72) |                    | 1.72 (0.93; 3.18) |                | 1.67 (0.86; 3.25) |
| <b>Alcohol consumption</b>          |                          |                               |                                        |                    |                   |                    |                   |                |                   |
| No                                  | 159 (44.3%)              | 93 (44.3%)                    | 27 (31.4%)                             | 0.999*             | 1                 | 0.029*             | 1                 | <b>0.040</b> * | 1                 |
| Yes                                 | 200 (55.7%)              | 117 (55.7%)                   | 59 (68.6%)                             |                    | 1.00 (0.71; 1.41) |                    | 1.74 (1.05; 2.87) |                | 1.74 (1.02; 2.95) |
| <b>Flossing</b>                     |                          |                               |                                        |                    |                   |                    |                   |                |                   |
| No                                  | 200 (56.0%)              | 122 (58.1%)                   | 51 (59.3%)                             | 0.660*             | 1                 | 0.582*             | 1                 | 0.848*         | 1                 |
| Yes                                 | 157 (44.0%)              | 88 (41.9%)                    | 35 (40.7%)                             |                    | 0.92 (0.65; 1.30) |                    | 0.87 (0.54; 1.41) |                | 0.95 (0.57; 1.58) |
| <b>Brushing</b>                     |                          |                               |                                        |                    |                   |                    |                   |                |                   |
| 1 time                              | 12 (3.3%)                | 10 (4.8%)                     | 6 (7.0%)                               | 0.638*             | 1                 | 0.303*             | 1                 | 0.741†         | 1                 |
| 2 times                             | 104 (29.1%)              | 63 (30.0%)                    | 25 (29.1%)                             |                    | 0.73 (0.30; 1.78) |                    | 0.48 (0.16; 1.41) |                | 0.66 (0.22; 2.01) |
| 3 or 4 times                        | 242 (67.6%)              | 137 (65.2%)                   | 55 (64.9%)                             |                    | 0.68 (0.29; 1.61) |                    | 0.82 (0.59; 1.14) |                | 0.88 (0.59; 1.29) |
| <b>Antidepressant use</b>           |                          |                               |                                        |                    |                   |                    |                   |                |                   |
| No                                  | 320 (89.9%)              | 172 (81.9%)                   | 61 (70.9%)                             | <b>0.006</b> *     | 1                 | <b>&lt;0.001</b> * | 1                 | <b>0.036</b> * | 1                 |

|                        |             |             |             |                   |                   |                   |                   |        |                   |
|------------------------|-------------|-------------|-------------|-------------------|-------------------|-------------------|-------------------|--------|-------------------|
| Yes                    | 36 (10.1%)  | 38 (18.1%)  | 25 (29.1%)  |                   | 1.96 (1.20; 3.21) |                   | 3.64 (2.04; 6.5)  |        | 1.86 (1.04; 3.32) |
| <b>Anxiolytics use</b> |             |             |             |                   |                   |                   |                   |        |                   |
| No                     | 306 (86.4%) | 161 (77.8%) | 65 (75.6%)  | <b>0.008*</b>     | 1                 | <b>0.013*</b>     | 1                 | 0.684* | 1                 |
| Yes                    | 48 (13.6%)  | 46 (22.2%)  | 21 (24.4%)  |                   | 1.82 (1.16; 2.85) |                   | 2.06 (1.15; 3.67) |        | 1.13 (0.63; 2.04) |
| <b>Diabetes</b>        |             |             |             |                   |                   |                   |                   |        |                   |
| No                     | 333 (93.0%) | 180 (85.7%) | 71 (82.6%)  | <b>0.004*</b>     | 1                 | <b>0.002*</b>     | 1                 | 0.492* | 1                 |
| Yes                    | 25 (7.0%)   | 30 (14.3%)  | 15 (17.4%)  |                   | 2.22 (1.27; 3.89) |                   | 2.81 (1.41; 5.61) |        | 1.27 (0.64; 2.5)  |
| <b>Body mass index</b> |             |             |             |                   |                   |                   |                   |        |                   |
| Mean ± s.d.            | 24.8 ± 1.8  | 25.8 ± 2.2  | 26.6 ± 3.1  | <b>&lt;0.001‡</b> | -                 | <b>&lt;0.001‡</b> | -                 | 0.055‡ | -                 |
| <b>Quality of life</b> |             |             |             |                   |                   |                   |                   |        |                   |
| Mean ± s.d.            | 3.3 ± 6.4   | 12.6 ± 25.5 | 14.6 ± 27.0 | 0.052§            | -                 | <b>0.011 §</b>    | -                 | 0.322‡ | -                 |
| <b>Quality of life</b> |             |             |             |                   |                   |                   |                   |        |                   |
| Not impacted           | 243 (67.7%) | 134 (63.8%) | 49 (57.0%)  |                   |                   | 0.060*            |                   | 0.272* |                   |
| Impacted               | 116 (32.3%) | 76 (36.2%)  | 37 (43.0%)  | 0.345*            | 1                 |                   | 1                 |        | 1                 |
|                        |             |             |             |                   | 1.19 (0.83; 1.70) |                   | 1.58 (0.98; 2.56) |        | 1.33 (0.8; 2.22)  |

Chi-square test (\*), Fisher's exact test (†), Student's t-test (‡) and Mann-Whitney test (§). Significant values in bold.



|                              |                  |               |               |                   |                   |                   |                   |                   |                   |
|------------------------------|------------------|---------------|---------------|-------------------|-------------------|-------------------|-------------------|-------------------|-------------------|
| <b>[number of teeth (%)]</b> |                  |               |               |                   |                   |                   |                   |                   |                   |
| < 3mm                        | 219 (2.5%)       | 174 (3.5%)    | 37 (1.8%)     |                   |                   |                   |                   |                   |                   |
| 3 to 6 mm                    | 7,583<br>(88.1%) | 4,336 (86.5%) | 1,701 (81.5%) | <b>0.002*</b>     | 1                 | <b>&lt;0.001*</b> | 1                 | <b>&lt;0.001*</b> | 1                 |
| > 6mm                        | 800 (9.3%)       | 506 (10.1%)   | 350 (16.8%)   |                   | 0.72 (0.59; 0.88) |                   | 1.33 (0.93; 1.89) |                   | 1.84 (1.29; 2.64) |
| <b>CAI (mm)</b>              |                  |               |               |                   | 0.80 (0.63; 1.00) |                   | 2.59 (1.79; 3.75) |                   | 3.25 (2.22; 4.76) |
| Mean ± s.d                   | 3.4 ± 0.7        | 3.9 ± 0.6     | 4.1 ± 0.6     | <b>&lt;0.001†</b> | -                 | <b>&lt;0.001†</b> | -                 | <b>0.004†</b>     | -                 |
| <b>% bleeding surfaces</b>   |                  |               |               |                   |                   |                   |                   |                   |                   |
| Mean ± s.d                   | 39.7 ± 14.4      | 43.7 ± 17.5   | 50.9 ± 15.8   | <b>0.034†</b>     | -                 | <b>&lt;0.001†</b> | -                 | <b>&lt;0.001†</b> | -                 |
| <b>% bleeding teeth</b>      |                  |               |               |                   |                   |                   |                   |                   |                   |
| Mean ± s.d                   | 62.1 ± 19.3      | 61.7 ± 16.8   | 68.0 ± 16.2   | 0.821†            | -                 | <b>0.007†</b>     | -                 | <b>0.002†</b>     | -                 |
| <b>Plaque Index</b>          |                  |               |               |                   |                   |                   |                   |                   |                   |
| Mean ± s.d                   | 39.4 ± 11.1      | 40.6 ± 10.0   | 44.9 ± 11.3   | 0.101†            | -                 | <b>&lt;0.001†</b> | -                 | <b>0.001†</b>     | -                 |

Chi-square test (\*) and Student's t test (†). probing depth (PD), clinical attachment level (CAL). Significant values in bold.

Table 3. Comparison between groups in relation to frequency and severity for each OIDP item

| OIDP                        | Control                  |                          | Psoriasis                |                          | Psoriatic arthritis      |                          |
|-----------------------------|--------------------------|--------------------------|--------------------------|--------------------------|--------------------------|--------------------------|
|                             | -PE                      | +PE                      | -PE                      | +PE                      | -PE                      | +PE                      |
| <b>Frequency</b>            |                          |                          |                          |                          |                          |                          |
| Eating                      | 0.46 (0.35; 0.58)        | 0.47 (0.29; 0.67)        | <b>0.43 (0.30; 0.57)</b> | <b>2.10 (1.60; 2.58)</b> | <b>0.59 (0.33; 0.86)</b> | <b>1.78 (1.16; 2.39)</b> |
| Speaking                    | <b>0.04 (0.01; 0.08)</b> | <b>0.22 (0.13; 0.32)</b> | <b>0.07 (0.03; 0.12)</b> | <b>1.40 (0.97; 1.87)</b> | <b>0.05 (0.00; 0.14)</b> | <b>0.94 (0.45; 1.43)</b> |
| Tooth cleaning              | 0.30 (0.21; 0.40)        | 0.52 (0.34; 0.72)        | <b>0.30 (0.18; 0.43)</b> | <b>2.17 (1.72; 2.65)</b> | <b>0.32 (0.08; 0.59)</b> | <b>1.41 (0.84; 1.98)</b> |
| Smiling                     | <b>0.33 (0.24; 0.43)</b> | <b>0.11 (0.03; 0.21)</b> | 0.10 (0.05; 0.17)        | 0.42 (0.17; 0.75)        | <b>0.19 (0.08; 0.32)</b> | <b>0.76 (0.33; 1.29)</b> |
| Sleeping                    | <b>0.00 (0.00; 0.00)</b> | <b>0.22 (0.11; 0.35)</b> | <b>0.02 (0.10; 0.33)</b> | <b>0.72 (0.39; 1.11)</b> | 0.27 (0.05; 0.51)        | 0.65 (0.24; 1.06)        |
| Maintaining emotional state | <b>0.01 (0.00; 0.04)</b> | <b>0.34 (0.18; 0.53)</b> | <b>0.19 (0.09; 0.30)</b> | <b>0.67 (0.31; 1.04)</b> | 0.16 (0.00; 0.38)        | 0.18 (0.00; 0.47)        |
| Activities                  | <b>0.01 (0.00; 0.03)</b> | <b>0.08 (0.03; 0.13)</b> | 0.09 (0.03; 0.17)        | 0.25 (0.07; 0.49)        | 0.30 (0.05; 0.57)        | 0.24 (0.00; 0.57)        |
| Leisure                     | 0.18 (0.12; 0.24)        | 0.17 (0.09; 0.25)        | <b>0.23 (0.14; 0.33)</b> | <b>0.72 (0.39; 1.12)</b> | 0.51 (0.27; 0.78)        | 0.37 (0.08; 0.73)        |
| <b>Gravity</b>              |                          |                          |                          |                          |                          |                          |
| Eating                      | 0.57 (0.45; 0.7)         | 0.61 (0.43; 0.82)        | <b>0.49 (0.28; 0.70)</b> | <b>2.10 (1.63; 2.57)</b> | 0.86 (0.43; 1.38)        | 1.59 (1.04; 2.16)        |
| Speaking                    | <b>0.03 (0.00; 0.06)</b> | <b>0.38 (0.24; 0.54)</b> | <b>0.38 (0.24; 0.56)</b> | <b>1.40 (0.97; 1.87)</b> | 0.49 (0.22; 0.81)        | 1.04 (0.53; 1.53)        |

|                             |                          |                          |                          |                          |                          |                          |
|-----------------------------|--------------------------|--------------------------|--------------------------|--------------------------|--------------------------|--------------------------|
| Tooth cleaning              | <b>0.20 (0.12; 0.28)</b> | <b>0.61 (0.41; 0.81)</b> | <b>0.28 (0.16; 0.42)</b> | <b>2.03 (1.60; 2.50)</b> | <b>0.32 (0.08; 0.65)</b> | <b>1.22 (0.73; 1.71)</b> |
| Smiling                     | <b>0.45 (0.34; 0.57)</b> | <b>0.17 (0.07; 0.30)</b> | 0.38 (0.22; 0.54)        | 0.44 (0.17; 0.78)        | 0.41 (0.14; 0.73)        | 0.65 (0.24; 1.14)        |
| Sleeping                    | <b>0.00 (0.00; 0.00)</b> | <b>0.25 (0.12; 0.39)</b> | <b>0.09 (0.02; 0.17)</b> | <b>0.69 (0.36; 1.07)</b> | 0.24 (0.03; 0.49)        | 0.65 (0.24; 1.06)        |
| Maintaining emotional state | <b>0.03 (0.00; 0.06)</b> | <b>0.42 (0.26; 0.60)</b> | 0.20 (0.10; 0.33)        | 0.61 (0.28; 0.94)        | 0.35 (0.11; 0.65)        | 0.16 (0.00; 0.41)        |
| Activities                  | <b>0.01 (0.00; 0.03)</b> | <b>0.14 (0.07; 0.24)</b> | 0.17 (0.07; 0.30)        | 0.33 (0.11; 0.61)        | 0.11 (0.00; 0.27)        | 0.24 (0.00; 0.57)        |
| Leisure                     | 0.30 (0.19; 0.40)        | 0.37 (0.22; 0.52)        | <b>0.17 (0.06; 0.30)</b> | <b>0.93 (0.56; 1.38)</b> | 0.24 (0.05; 0.49)        | 0.78 (0.33; 1.22)        |

---

\*Bootstrap range. The values marked in bold indicate the non-overlapping CIs comparing the groups with and without periodontal disease, that is, those with significant differences.



**Table 4. Dichotomous influence of variables of interest on quality of life**

| Variables                  | Quality of life        |                    | p                 |
|----------------------------|------------------------|--------------------|-------------------|
|                            | Not impacted (n = 426) | Impacted (n = 229) |                   |
| <b>Diabetes</b>            |                        |                    |                   |
| Yes                        | 40 (57.1%)             | 30 (42.9%)         | 0.146*            |
| No                         | 385 (65.9%)            | 199 (34.1%)        |                   |
| <b>Body mass index</b>     |                        |                    |                   |
| Mean ± s.d                 | 25.3 ± 2.2             | 25.5 ± 2.3         | 0.253†            |
| <b>Smoking</b>             |                        |                    |                   |
| Yes                        | 59 (66.3%)             | 30 (33.7%)         | 0.790*            |
| No                         | 367 (64.8%)            | 199 (35.2%)        |                   |
| <b>Alcohol consumption</b> |                        |                    |                   |
| Yes                        | 222 (59.0%)            | 154 (41.0%)        | <b>&lt;0.001*</b> |
| No                         | 204 (73.1%)            | 75 (26.9%)         |                   |
| <b>Flossing</b>            |                        |                    |                   |
| Yes                        | 179 (63.9%)            | 101 (36.1%)        | 0.642*            |
| No                         | 245 (65.7%)            | 128 (34.3%)        |                   |
| <b>Brushing</b>            |                        |                    |                   |
| 1 time                     | 16 (57.1%)             | 12 (42.9%)         | 0.270*            |
| 2 times                    | 118 (61.5%)            | 74 (38.5%)         |                   |
| Three times                | 291 (67.1%)            | 143 (32.9%)        |                   |
| <b>Antidepressant use</b>  |                        |                    |                   |
| Yes                        | 63 (63.6%)             | 36 (36.4%)         | 0.779*            |
| No                         | 360 (65.1%)            | 193 (34.9%)        |                   |
| <b>Anxiolytics use</b>     |                        |                    |                   |
| Yes                        | 58 (50.4%)             | 57 (49.6%)         | <b>&lt;0.001*</b> |
| No                         | 360 (67.7%)            | 172 (32.3%)        |                   |
| <b>Gender</b>              |                        |                    |                   |
| Feminine                   | 274 (67.3%)            | 133 (32.7%)        | 0.116*            |
| Masculine                  | 152 (61.3%)            | 96 (38.7%)         |                   |
| <b>Age (years)</b>         |                        |                    |                   |
| Mean ± s.d                 | 48.4 ± 5.0             | 48.2 ± 4.4         | 0.645**           |
| <b>Income</b>              |                        |                    |                   |
| 1-2 BMW                    | 166 (63.1%)            | 97 (36.9%)         |                   |
| 3-4 BMW                    | 173 (70.3%)            | 73 (29.7%)         |                   |
| 5 BMW or more              | 87 (59.6%)             | 59 (40.4%)         | 0.069*            |
| <b>Educational level</b>   |                        |                    |                   |
| < 8 years                  | 300 (67.1%)            | 147 (32.9%)        |                   |
| > 8 years                  | 126 (60.6%)            | 82 (39.4%)         |                   |
| <b>Smoking</b>             |                        |                    |                   |
| Yes                        | 59 (66.3%)             | 30 (33.7%)         | 0.102*            |
| No                         | 367 (64.8%)            | 199 (35.2%)        | 0.790*            |
| <b>Periodontitis</b>       |                        |                    |                   |
| Yes                        | 130(30.5%)             | 110 (48.0%)        | <b>&lt;0.001*</b> |
| No                         | 296 (69.5%)            | 119 (52%)          |                   |
| <b>Group</b>               |                        |                    |                   |
| PE+ control                | 74 (62.2%)             | 45 (37.8%)         | 0.121*            |
| Psoriatic Arthritis +PE    | 27 (55.1%)             | 22 (44.9%)         | 0.826*            |
| PE+ psoriasis              | 29 (40.3%)             | 43 (59.7%)         | <b>&lt;0.001*</b> |

\*Chi-Square Test and Student's t test (†). Brazilian Minimum Wage (BMW). Significant values in bold.

Table 5. Logistic regression of variables of interest associated with impacts on quality of life

| Variables                                    | Full model |                   |                   | Final model |                   |                   |
|----------------------------------------------|------------|-------------------|-------------------|-------------|-------------------|-------------------|
|                                              | $\beta$    | p                 | OR (95% CI)       | $\beta$     | p                 | OR (95% CI)       |
| <b>Gender (Ref. Female)</b>                  |            |                   |                   |             |                   |                   |
| Masculine                                    | 0.21       | 0.247             | 1.23 (0.87; 1.74) |             |                   |                   |
| <b>Income (Ref. 3 to 4 BMW)</b>              |            |                   |                   |             |                   |                   |
| 1 to 2 BMW                                   | 0.24       | 0.222             | 1.28 (0.86; 1.89) | 0.27        | 0.164             | 1.32 (0.89; 1.94) |
| 5 BMW or more                                | 0.58       | <b>0.011</b>      | 1.78 (1.14; 2.80) | 0.57        | <b>0.011</b>      | 1.78 (1.14; 2.77) |
| <b>Educational level (ref. &lt; 8 years)</b> |            |                   |                   |             |                   |                   |
| > 8 years                                    | 0.39       | <b>0.038</b>      | 1.47 (1.02; 2.13) |             |                   |                   |
| <b>Alcohol consumption (Ref. No)</b>         |            |                   |                   |             |                   |                   |
| Yes                                          | 0.53       | <b>0.004</b>      | 1.69 (1.19; 2.42) | 0.56        | <b>0.002</b>      | 1.74 (1.23; 2.47) |
| <b>Anxiolytics use (Ref. No)</b>             |            |                   |                   |             |                   |                   |
| Yes                                          | 0.72       | <b>0.001</b>      | 2.05 (1.32; 3.18) | 0.66        | <b>0.002</b>      | 1.93 (1.26; 2.95) |
| <b>Diabetes (Ref. No)</b>                    |            |                   |                   |             |                   |                   |
| Yes                                          | 0.44       | 0.112             | 1.55 (0.90; 2.66) |             |                   |                   |
| <b>Body mass index</b>                       | -0.03      | 0.531             | 0.97 (0.90; 1.06) | -           | -                 | -                 |
| <b>Group (Ref. Control)</b>                  |            |                   |                   |             |                   |                   |
| Psoriasis                                    | 0.12       | 0.537             | 1.13 (0.77; 1.67) |             |                   |                   |
| Psoriatic arthritis                          | 0.15       | 0.586             | 1.16 (0.68; 1.96) | -           | -                 | -                 |
| <b>Periodontitis (Ref. No)</b>               |            |                   |                   |             |                   |                   |
| Yes                                          | 0.66       | <b>&lt; 0.001</b> | 1.93 (1.34; 2.78) | 0.65        | <b>&lt; 0.001</b> | 1.92 (1.36; 2.71) |

Hosmes-Lemeshow test ( $p = 0.170$ ) / AOC = 0.645 / Sensitivity = 0.245 / Specificity = 0.938 / Pseudo R2 = 9.3%. Brazilian Minimum Wage (BMW). Significant values in bold

**Table 6. Association analysis between quality of life and periodontal parameters**

| Variables                        | Quality of life           |                       | p                   |
|----------------------------------|---------------------------|-----------------------|---------------------|
|                                  | Not impacted<br>(n = 426) | Impacted<br>(n = 229) |                     |
| <b>Periodontitis</b>             |                           |                       |                     |
| Yes                              | 130 (54.2%)               | 110 (45.8%)           | <b>&lt; 0.001*</b>  |
| No                               | 296 (71.3%)               | 119 (28.7%)           |                     |
| <b>Number of teeth</b>           |                           |                       |                     |
| Mean ± s.d                       | 23.9 ± 3.0                | 24.1 ± 2.7            | 0.558†              |
| <b>PD [number of sites (%)]</b>  |                           |                       |                     |
| < 3mm                            | <b>16,967 (41.6%)</b>     | 8,631 (39.1%)         | <b>&lt; 0.001*</b>  |
| 3 to 6 mm                        | 22,959 (56.4%)            | 12,776 (57.8%)        |                     |
| > 6mm                            | 803 (2.0%)                | <b>685 (3.1%)</b>     |                     |
| <b>PD [number of teeth (%)]</b>  |                           |                       |                     |
| < 3mm                            | 2,932 (28.8%)             | 1,438 (26.0%)         | <b>&lt; 0.001*</b>  |
| 3 to 6 mm                        | 6,755 (66.3%)             | 3,640 (65.9%)         |                     |
| > 6mm                            | 495 (4.9%)                | <b>445 (8.1%)</b>     |                     |
| <b>PD (mm)</b>                   |                           |                       |                     |
| Mean ± s.d                       | 3.0 ± 0.6                 | 3.2 ± 0.8             | <b>&lt; 0.001†</b>  |
| <b>CAL [number of sites (%)]</b> |                           |                       |                     |
| < 3mm                            | 3,626 (8.9%)              | 276 (2.7%)            |                     |
| 3 to 6 mm                        | 35,785 (87.8%)            | 9,050 (88.9%)         | <b>&lt; 0.001 *</b> |
| > 6mm                            | 1,325 (3.3%)              | <b>858 (8.4%)</b>     |                     |
| <b>CAL [number of teeth (%)]</b> |                           |                       |                     |
| < 3mm                            | 276 (2.7%)                | 154 (2.8%)            | <b>&lt; 0.001*</b>  |
| 3 to 6 mm                        | 9,050 (88.9%)             | 4,570 (82.8%)         |                     |
| > 6mm                            | 858 (8.4%)                | <b>798 (14.5%)</b>    |                     |
| <b>CAL (mm)</b>                  |                           |                       |                     |
| Mean ± s.d                       | 3.6 ± 0.7                 | 3.8 ± 0.8             | <b>&lt; 0.001†</b>  |
| <b>% bleeding surfaces</b>       |                           |                       |                     |
| Mean ± s.d                       | 41.2 ± 15.7               | 44.8 ± 16.6           | <b>0.005†</b>       |
| <b>% bleeding teeth</b>          |                           |                       |                     |
| Mean ± s.d                       | 61.4 ± 18.3               | 65.3 ± 17.9           | <b>0.006†</b>       |
| <b>Plaque index</b>              |                           |                       |                     |
| Mean ± s.d                       | 39.7 ± 10.7               | 41.9 ± 11.2           | <b>0.002†</b>       |

Chi-square test (\*) and Mann-Whitney test (†); probing depth (PD); clinical attachment level (CAL). Significant values in bold.

**Supporting Figure 1. Stratification of OIDP scores between groups**

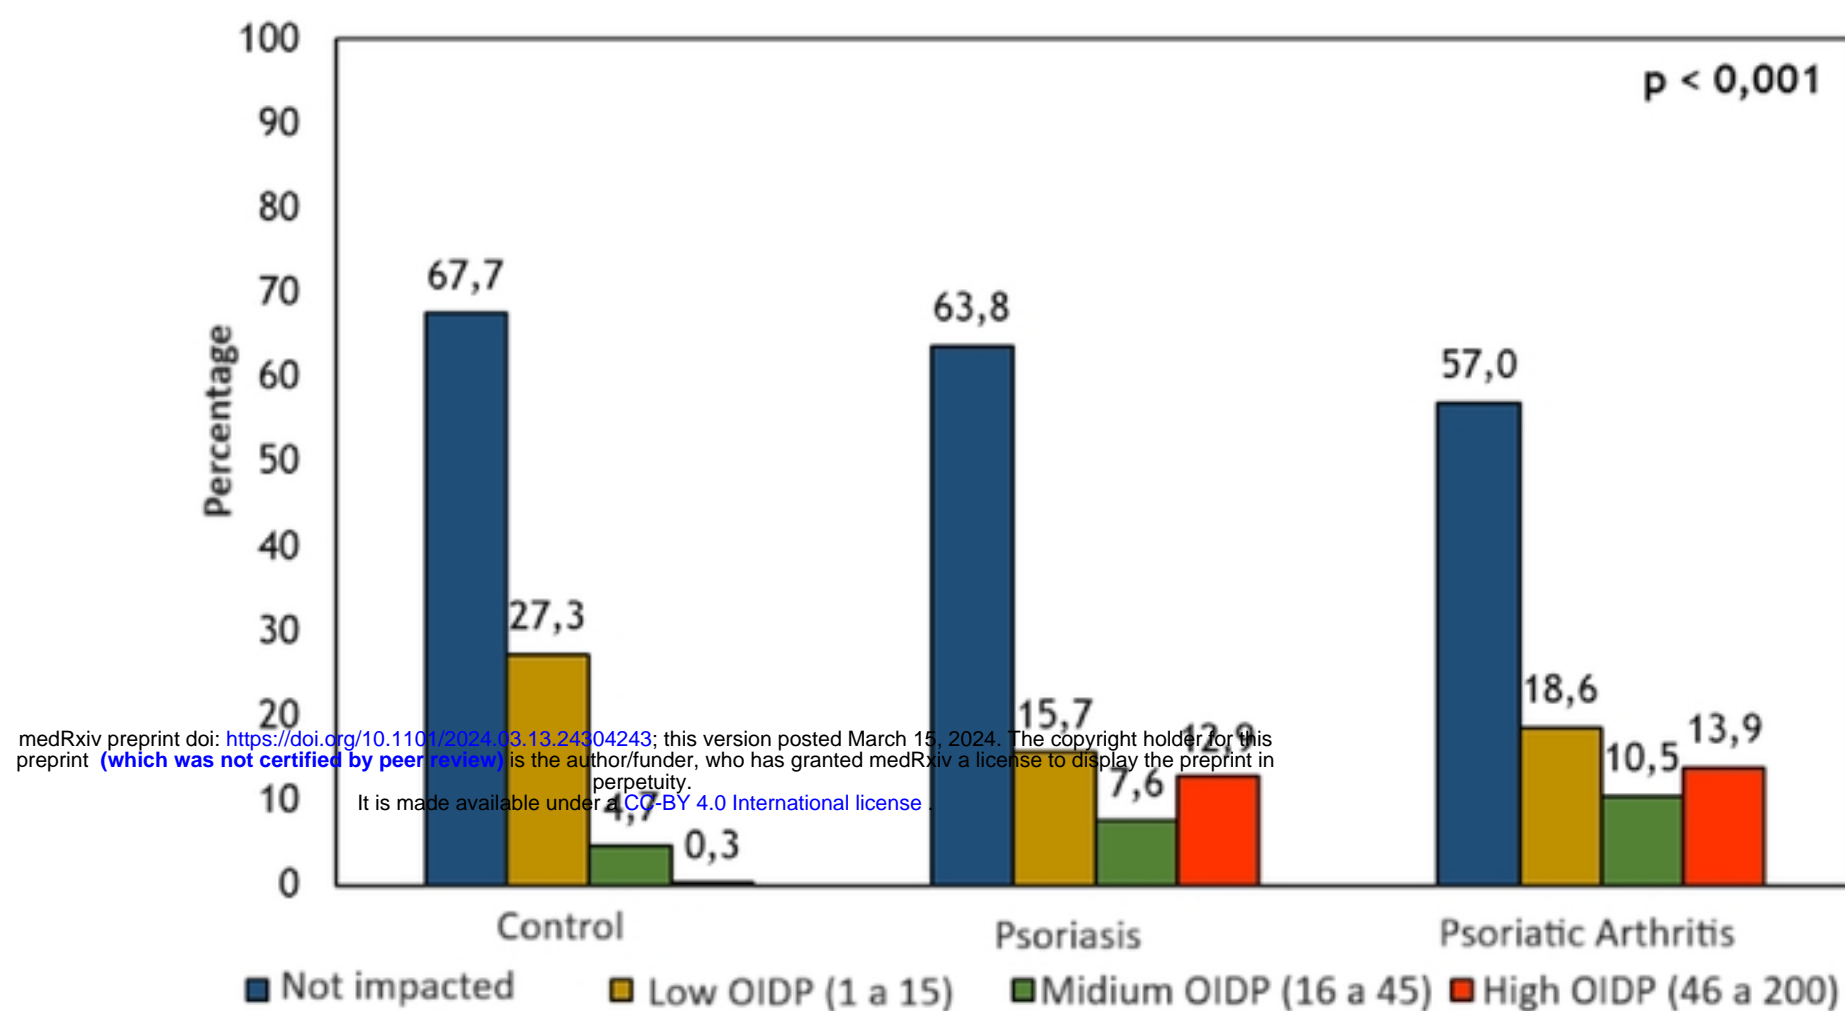

n= 655;  $p < 0.001$  (Chi-square test). Note: The higher the OIDP, the worse the quality of life.
